# Supplementary material
Source: publisher figshare collection journal article supplement (https://aacr.figshare.com/articles/dataset/_/22930488)

Figure S8

A

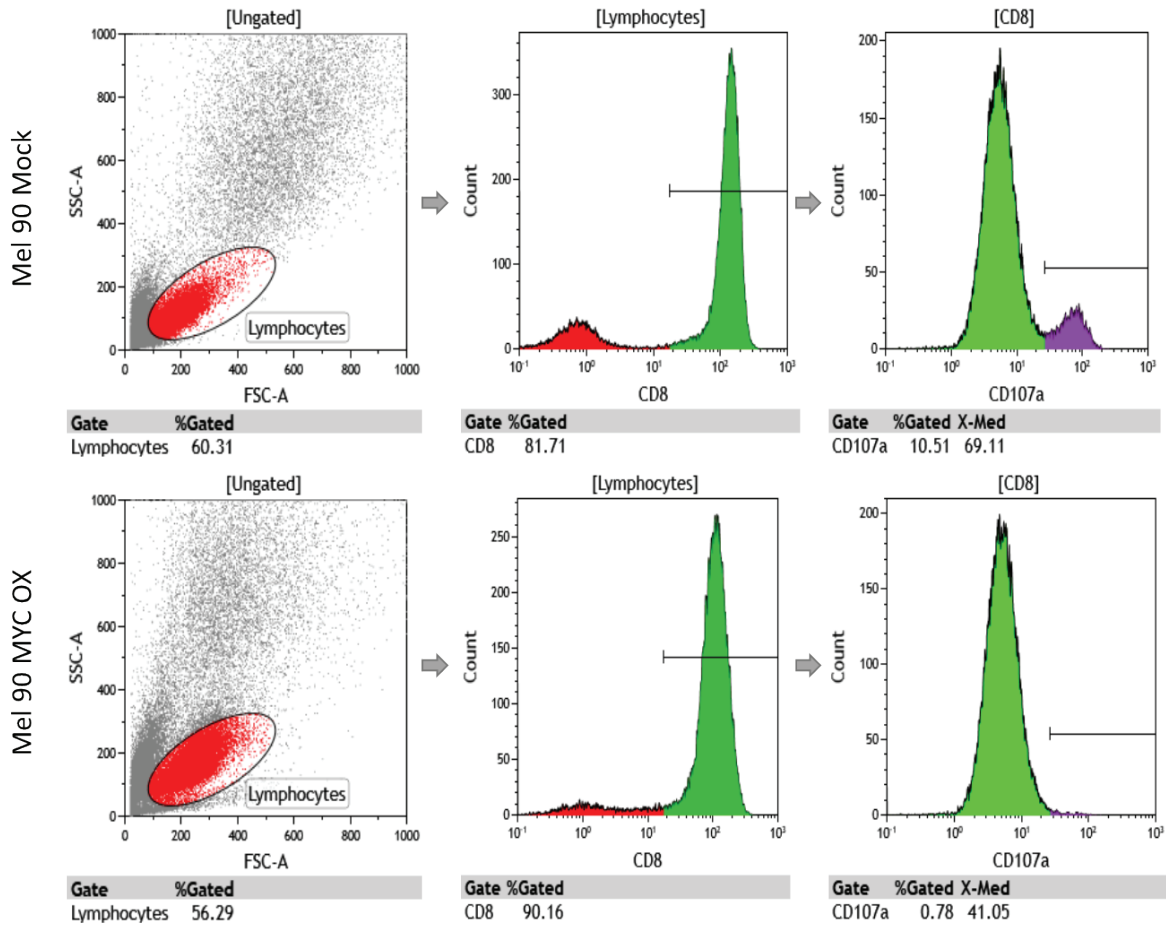

B

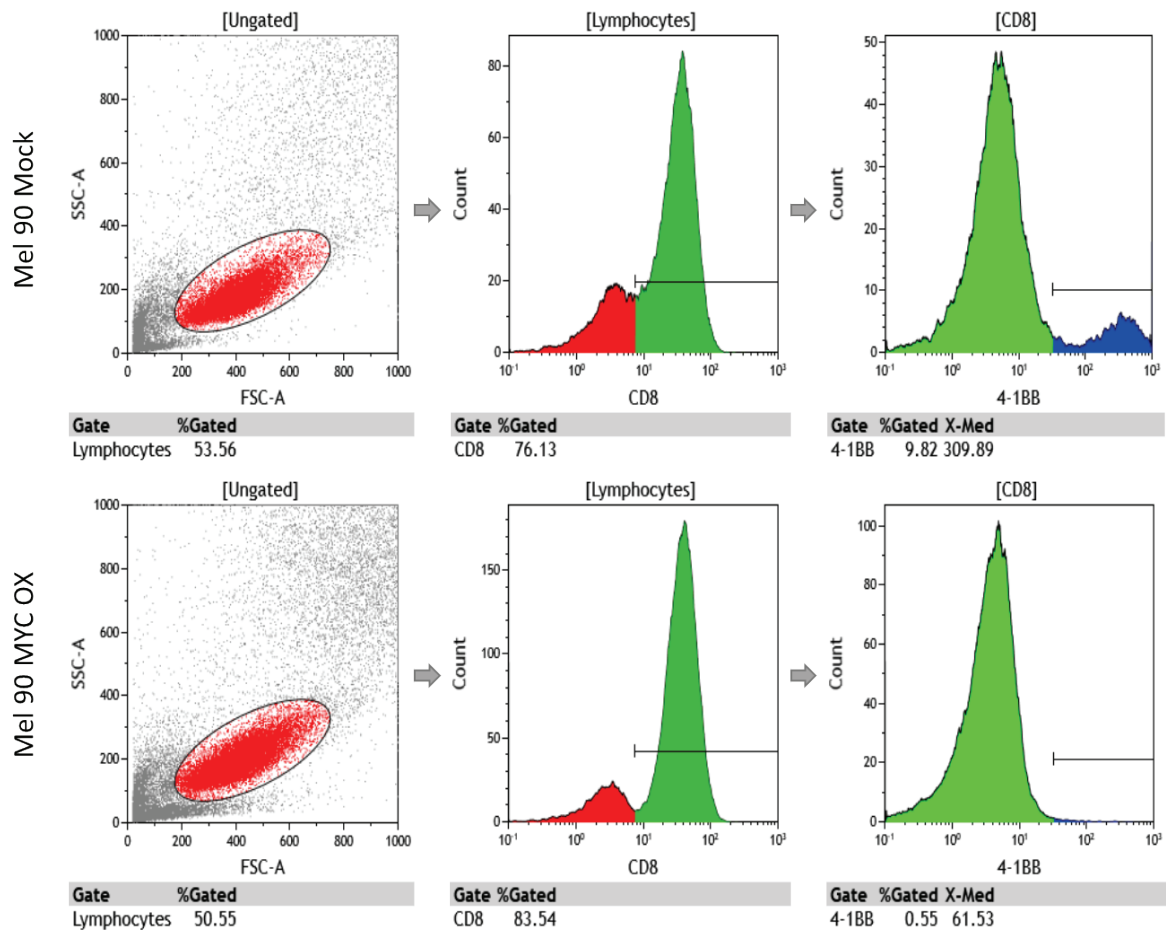

Supplement: Supplementary file 1 [file 40665069]
